# Supplementary material for: Alkali-metal isocyanurate Cs3(H2C3N3O3)3(H3C3N3O3)·3H2O: synthesis and characterization
Source: Royal Society of Chemistry journal article supplement (doi:10.1039/d4ce00497c), 2024-01-01
Supplement: d4ce00497c1.pdf [file d4ce00497c1.pdf]

## Supplementary Information

# An alkali-metal isocyanurate $\text{Cs}_3(\text{H}_2\text{C}_3\text{N}_3\text{O}_3)_3(\text{H}_3\text{C}_3\text{N}_3\text{O}_3)\cdot 3\text{H}_2\text{O}$ : synthesis and characterization

Xinyue Wang,<sup>a</sup> Dandan Wang,<sup>a,b,\*</sup> Yujie Liu,<sup>c</sup> Jinhui Wang<sup>d</sup>

<sup>a</sup> *Tianjin Key Laboratory of Functional Crystal Materials, Institute of Functional Crystals, School of Materials Science and Engineering, Tianjin University of Technology, Tianjin 300384, China.*

<sup>b</sup> *Huace Eco Environmental Technology (Tianjin) Co., Ltd., Tianjin 300399, China.*  
*Email: wdd0023@163.com.*

<sup>c</sup> *Huaneng Renewables Corporation Limited Shandong Branch, Jinan 250100, China.*

<sup>d</sup> *Semiconductor Manufacturing International Corporation, Tianjin 300385, China.*

## Contents.

**Table S1.** Fractional atomic coordinates ( $\times 10^4$ ) and equivalent isotropic displacement parameters ( $\text{\AA}^2 \times 10^3$ ) of  $\text{Cs}_3(\text{H}_2\text{C}_3\text{N}_3\text{O}_3)_3(\text{H}_3\text{C}_3\text{N}_3\text{O}_3) \cdot 3\text{H}_2\text{O}$ .

**Table S2.** Anisotropic displacement parameters ( $\text{\AA}^2 \times 10^3$ ) of  $\text{Cs}_3(\text{H}_2\text{C}_3\text{N}_3\text{O}_3)_3(\text{H}_3\text{C}_3\text{N}_3\text{O}_3) \cdot 3\text{H}_2\text{O}$ .

**Table S3.** Selected bond lengths [ $\text{\AA}$ ] of  $\text{Cs}_3(\text{H}_2\text{C}_3\text{N}_3\text{O}_3)_3(\text{H}_3\text{C}_3\text{N}_3\text{O}_3) \cdot 3\text{H}_2\text{O}$ .

**Table S4.** Selected bond angles ( $^\circ$ ) of  $\text{Cs}_3(\text{H}_2\text{C}_3\text{N}_3\text{O}_3)_3(\text{H}_3\text{C}_3\text{N}_3\text{O}_3) \cdot 3\text{H}_2\text{O}$ .

**Table S5.** Birefringence properties of isocyanurate compounds.

**Figure S1.** EDS analysis of  $\text{Cs}_3(\text{H}_2\text{C}_3\text{N}_3\text{O}_3)_3(\text{H}_3\text{C}_3\text{N}_3\text{O}_3) \cdot 3\text{H}_2\text{O}$ .

**Figure S2.** The TG and DSC curves (a) and PXRD patterns for the residual (b) of  $\text{Cs}_3(\text{H}_2\text{C}_3\text{N}_3\text{O}_3)_3(\text{H}_3\text{C}_3\text{N}_3\text{O}_3) \cdot 3\text{H}_2\text{O}$ .

**Figure S3.** The IR spectrum of  $\text{Cs}_3(\text{H}_2\text{C}_3\text{N}_3\text{O}_3)_3(\text{H}_3\text{C}_3\text{N}_3\text{O}_3) \cdot 3\text{H}_2\text{O}$ .

**Figure S4.** The Raman spectrum of  $\text{Cs}_3(\text{H}_2\text{C}_3\text{N}_3\text{O}_3)_3(\text{H}_3\text{C}_3\text{N}_3\text{O}_3) \cdot 3\text{H}_2\text{O}$ .

**Figure S5.** The measured birefringence of  $\text{Cs}_3(\text{H}_2\text{C}_3\text{N}_3\text{O}_3)_3(\text{H}_3\text{C}_3\text{N}_3\text{O}_3) \cdot 3\text{H}_2\text{O}$ .

## 1. Supplementary Tables.

**Table S1.** Fractional atomic coordinates ( $\times 10^4$ ) and equivalent isotropic displacement parameters ( $\text{\AA}^2 \times 10^3$ ) of  $\text{Cs}_3(\text{H}_2\text{C}_3\text{N}_3\text{O}_3)_3(\text{H}_3\text{C}_3\text{N}_3\text{O}_3) \cdot 3\text{H}_2\text{O}$ .

| Atom | x          | y         | z         | $U_{\text{(eq)}}^{\text{a}}$ |
|------|------------|-----------|-----------|------------------------------|
| Cs1  | 2068.9(3)  | 7920.1(3) | 1421.7(3) | 34.97(9)                     |
| Cs2  | 6103.3(3)  | 1847.2(3) | 1739.3(3) | 40.36(9)                     |
| Cs3  | 12085.4(3) | 7236.1(3) | 4586.1(3) | 41.13(9)                     |
| O9   | 9134(3)    | 7621(3)   | 3841(3)   | 33.2(7)                      |
| O10  | 8344(3)    | 577(3)    | 3668(3)   | 39.7(8)                      |
| O6   | 9263(3)    | 8316(3)   | 1214(3)   | 37.0(8)                      |
| O3   | 2772(3)    | 1083(3)   | 1412(3)   | 37.1(8)                      |
| N3   | 2565(4)    | 3140(4)   | 1294(3)   | 28.5(9)                      |
| N9   | 6965(4)    | 7715(4)   | 3703(3)   | 27.6(8)                      |
| N5   | 7435(4)    | 6353(3)   | 1277(3)   | 28.5(8)                      |
| C5   | 6049(4)    | 5737(4)   | 1255(3)   | 25.3(9)                      |
| C2   | -278(5)    | 1919(4)   | 1048(3)   | 26.8(9)                      |
| C12  | 11642(5)   | 3102(4)   | 3716(3)   | 25.6(9)                      |
| Cs1  | 2068.9(3)  | 7920.1(3) | 1421.7(3) | 34.97(9)                     |
| Cs2  | 6103.3(3)  | 1847.2(3) | 1739.3(3) | 40.36(9)                     |

<sup>a</sup> $U_{\text{(eq)}}$  is defined as one-third of the trace of the orthogonalized  $U_{ij}$  tensor.

**Table S2.** Anisotropic displacement parameters ( $\text{\AA}^2 \times 10^3$ ) of  $\text{Cs}_3(\text{H}_2\text{C}_3\text{N}_3\text{O}_3)_3(\text{H}_3\text{C}_3\text{N}_3\text{O}_3) \cdot 3\text{H}_2\text{O}$ .

| Atom | $U_{11}$  | $U_{22}$  | $U_{33}$ | $U_{23}$  | $U_{13}$  | $U_{12}$  |
|------|-----------|-----------|----------|-----------|-----------|-----------|
| Cs1  | 29.55(16) | 28.38(15) | 53.2(2)  | 13.88(13) | 16.29(14) | 15.67(12) |
| Cs2  | 36.54(18) | 34.22(16) | 56.0(2)  | 12.94(14) | 20.20(16) | 17.09(14) |
| Cs3  | 37.23(18) | 35.90(17) | 54.5(2)  | 12.59(15) | 18.89(16) | 16.83(14) |
| O5   | 27.1(17)  | 21.5(15)  | 61(2)    | 19.9(15)  | 18.6(16)  | 9.2(13)   |
| O2   | 19.0(16)  | 29.2(16)  | 61(2)    | 14.3(16)  | 15.1(16)  | 8.5(13)   |
| O7   | 32.8(19)  | 26.9(17)  | 81(3)    | 18.5(17)  | 26.6(19)  | 18.2(15)  |
| O4   | 25.7(17)  | 34.9(18)  | 71(3)    | 24.4(17)  | 22.8(18)  | 18.5(15)  |
| N2   | 24(2)     | 18.2(18)  | 43(2)    | 12.5(17)  | 14.1(18)  | 6.9(16)   |
| N6   | 24(2)     | 19.6(18)  | 51(3)    | 15.3(18)  | 18.0(19)  | 9.9(16)   |
| N12  | 20.0(19)  | 22.8(18)  | 42(2)    | 13.7(16)  | 16.2(18)  | 7.9(16)   |
| C5   | 24(2)     | 25(2)     | 29(2)    | 8.4(18)   | 11.1(19)  | 8.7(18)   |
| C2   | 25(2)     | 24(2)     | 35(3)    | 9.4(19)   | 13(2)     | 12.6(19)  |
| C12  | 25(2)     | 24(2)     | 32(2)    | 10.1(18)  | 14(2)     | 10.3(18)  |

**Table S3.** Selected bond lengths [Å] of Cs<sub>3</sub>(H<sub>2</sub>C<sub>3</sub>N<sub>3</sub>O<sub>3</sub>)<sub>3</sub>(H<sub>3</sub>C<sub>3</sub>N<sub>3</sub>O<sub>3</sub>)<sub>3</sub>·3H<sub>2</sub>O.

| Atom | Atom             | Length/Å  | Atom | Atom             | Length/Å  |
|------|------------------|-----------|------|------------------|-----------|
| Cs1  | Cs3 <sup>1</sup> | 4.4595(6) | Cs1  | O2 <sup>4</sup>  | 3.390(3)  |
| O2   | Cs1 <sup>4</sup> | 3.390(3)  | Cs1  | O7               | 3.632(4)  |
| O2   | Cs2 <sup>1</sup> | 3.098(3)  | Cs1  | O4               | 3.145(3)  |
| O2   | C2               | 1.243(5)  | Cs1  | C2 <sup>4</sup>  | 3.486(4)  |
| O4   | C4               | 1.221(5)  | Cs2  | Cs1 <sup>5</sup> | 4.5650(6) |
| N6   | C6               | 1.380(5)  | Cs2  | O8               | 3.575(3)  |
| N5   | C6               | 1.349(5)  | N10  | C10              | 1.344(5)  |
| N1   | C1               | 1.341(5)  | N4   | C5               | 1.378(5)  |

<sup>1</sup>-1+X,+Y,+Z; <sup>2</sup>+X,1+Y,+Z; <sup>3</sup>-1+X,1+Y,+Z; <sup>4</sup>-X,1-Y,-Z; <sup>5</sup>+X,-1+Y,+Z; <sup>6</sup>2-X,1-Y,1-Z;  
<sup>7</sup>1+X,+Y,+Z; <sup>8</sup>1-X,1-Y,-Z; <sup>9</sup>1+X,-1+Y,+Z

**Table S4.** Selected bond angles (°) of  $\text{Cs}_3(\text{H}_2\text{C}_3\text{N}_3\text{O}_3)_3(\text{H}_3\text{C}_3\text{N}_3\text{O}_3)\cdot 3\text{H}_2\text{O}$ .

| Atom            | Atom | Atom             | Angle/°   | Atom             | Atom | Atom             | Angle/°   |
|-----------------|------|------------------|-----------|------------------|------|------------------|-----------|
| O6 <sup>1</sup> | Cs1  | O3 <sup>2</sup>  | 72.63(8)  | O12              | Cs3  | O9               | 121.38(8) |
| O12             | Cs3  | O8 <sup>6</sup>  | 61.74(8)  | O6 <sup>1</sup>  | Cs1  | O7               | 133.83(8) |
| O12             | Cs3  | O11 <sup>2</sup> | 133.50(8) | O6 <sup>1</sup>  | Cs1  | O4               | 150.71(8) |
| O12             | Cs3  | O7 <sup>8</sup>  | 67.65(7)  | O6 <sup>1</sup>  | Cs1  | O15 <sup>2</sup> | 114.65(9) |
| O12             | Cs3  | N10 <sup>6</sup> | 122.41(7) | O3 <sup>2</sup>  | Cs1  | N1 <sup>4</sup>  | 92.44(8)  |
| O6 <sup>1</sup> | Cs1  | N1 <sup>4</sup>  | 64.99(9)  | O3 <sup>2</sup>  | Cs1  | O4               | 85.21(7)  |
| O3 <sup>2</sup> | Cs1  | Cs3 <sup>1</sup> | 111.24(6) | O11 <sup>2</sup> | Cs3  | O8 <sup>6</sup>  | 131.31(7) |

<sup>1</sup>-1+X,+Y,+Z; <sup>2</sup>+X,1+Y,+Z; <sup>3</sup>-1+X,1+Y,+Z; <sup>4</sup>-X,1-Y,-Z; <sup>5</sup>+X,-1+Y,+Z; <sup>6</sup>2-X,1-Y,1-Z;  
<sup>7</sup>1+X,+Y,+Z; <sup>8</sup>1-X,1-Y,-Z; <sup>9</sup>1+X,-1+Y,+Z

**Table S5.** Birefringence properties of some isocyanurate compounds.

| Compound                                                                                                                                     | $\Delta n$       | Ref |
|----------------------------------------------------------------------------------------------------------------------------------------------|------------------|-----|
| $\text{K}_3\text{Pb}(\text{H}_2\text{C}_3\text{N}_3\text{O}_3)_5(\text{H}_2\text{O})_6$                                                      | 0.181 @ 1064 nm  | S1  |
| $\text{Li}_2\text{Zn}_2(\text{H}_2\text{C}_3\text{N}_3\text{O}_3)_2(\text{HC}_3\text{N}_3\text{O}_3)(\text{OH})_2 \cdot 2\text{H}_2\text{O}$ | 0.174 @ 1064 nm  | S2  |
| $\text{BaZn}_2(\text{H}_2\text{C}_3\text{N}_3\text{O}_3)_2(\text{HC}_3\text{N}_3\text{O}_3)(\text{OH})_2 \cdot 2\text{H}_2\text{O}$          | 0.191 @ 1064 nm  | S2  |
| $\text{Mg}(\text{H}_2\text{C}_3\text{N}_3\text{O}_3)_2 \cdot 6\text{H}_2\text{O}$                                                            | 0.093 @ 800 nm   | S3  |
| $\text{RbLi}(\text{HC}_3\text{N}_3\text{O}_3) \cdot 2\text{H}_2\text{O}$                                                                     | 0.180 @ 514.6 nm | S4  |
| $\text{SrHC}_3\text{N}_3\text{O}_3$                                                                                                          | 0.184 @ 800 nm   | S3  |
| $\text{RbNa}(\text{HC}_3\text{N}_3\text{O}_3) \cdot 2\text{H}_2\text{O}$                                                                     | 0.194 @ 589.6 nm | S5  |
| $\text{KLi}(\text{HC}_3\text{N}_3\text{O}_3) \cdot 2\text{H}_2\text{O}$                                                                      | 0.186 @ 514 nm   | S6  |

## 2. Supplementary Figures.

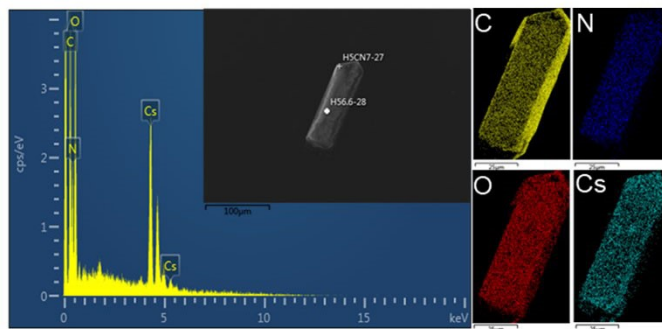

**Figure S1.** EDS analysis of  $\text{Cs}_3(\text{H}_2\text{C}_3\text{N}_3\text{O}_3)_3(\text{H}_3\text{C}_3\text{N}_3\text{O}_3)\cdot 3\text{H}_2\text{O}$ .



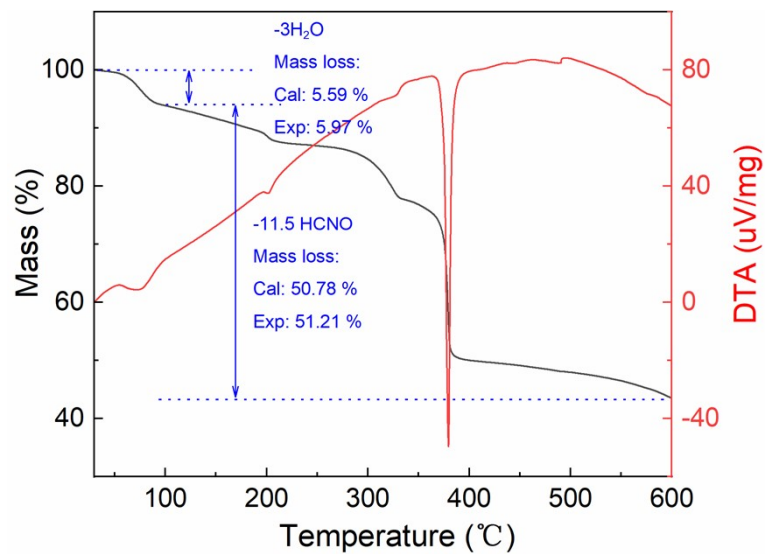

**Figure S2.** The TG and DTA curves (a) and PXRD patterns for the residual (b) of

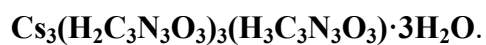

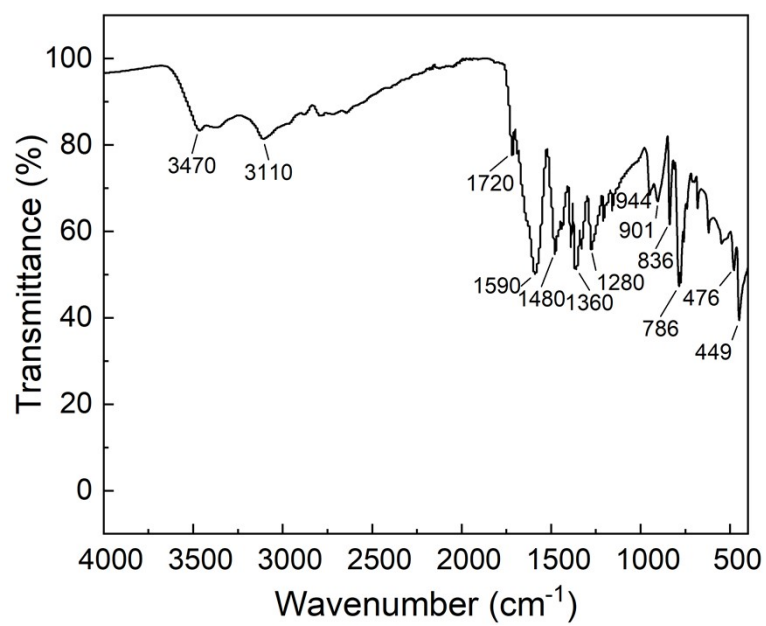

**Figure S3.** The IR spectrum of  $\text{Cs}_3(\text{H}_2\text{C}_3\text{N}_3\text{O}_3)_3(\text{H}_3\text{C}_3\text{N}_3\text{O}_3)\cdot 3\text{H}_2\text{O}$ .

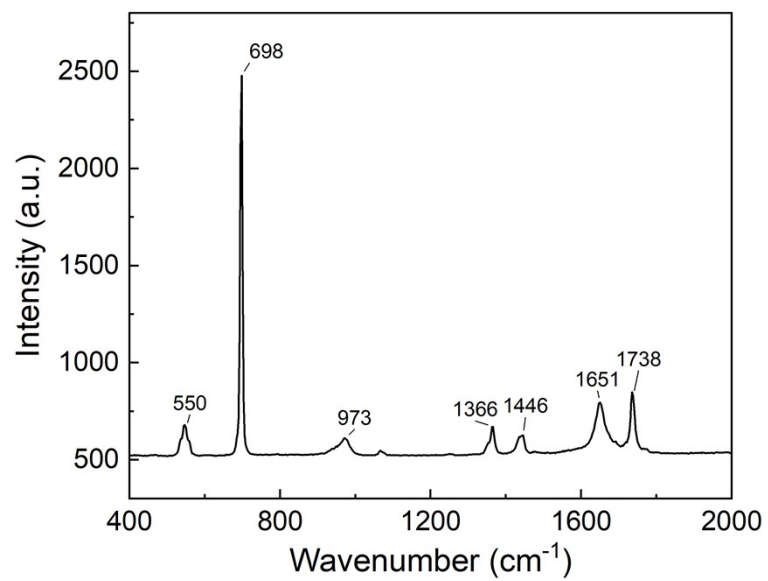

**Figure S4.** The Raman spectrum of  $\text{Cs}_3(\text{H}_2\text{C}_3\text{N}_3\text{O}_3)_3(\text{H}_3\text{C}_3\text{N}_3\text{O}_3)\cdot 3\text{H}_2\text{O}$ .

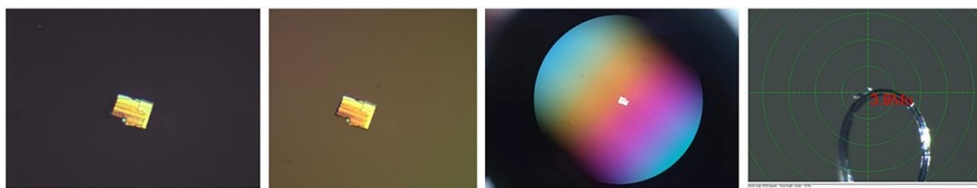

**Figure S5.** The measured birefringence of  $\text{Cs}_3(\text{H}_2\text{C}_3\text{N}_3\text{O}_3)_3(\text{H}_3\text{C}_3\text{N}_3\text{O}_3)\cdot 3\text{H}_2\text{O}$ .

## References

- S1. Y. Chen, C. L. Hu, Z. Fang and J. G. Mao, *Inorg. Chem. Front.*, 2021, **8**, 3547-3555.
- S2. D. D. Wang, F. Liang, X. Y. Zhang, Z. G. Hu and Y. C. Wu, *Cryst. Growth Des.*, 2021, **21**, 2348-2354.
- S3. X. H. Meng, K. J. Kang, F. Liang, J. Tang, W. L. Yin, Z. S. Lin and M. J. Xia, *Inorg. Chem. Front.*, 2020, **7**, 3674-3686.
- S4. X. H. Meng, F. Liang, K. J. Kang, J. Tang, T. X. Zeng, Z. S. Lin and M. J. Xia, *Inorg. Chem.*, 2019, **58**, 11289-11293.
- S5. Y. X. Song, D. H. Lin, M. Luo, C. S. Lin, Q. L. Chen and N. Ye, *Inorg. Chem. Front.*, 2020, **7**, 150-156.
- S6. D. H. Lin, M. Luo, C. S. Lin, F. Xu and N. Ye, *J. Am. Chem. Soc.*, 2019, **141**, 3390-3394.
